# Supplementary material
Source: PubMed Central journal article supplement (PMC8815499)
Supplement: KID.0003962020SupplementaryData.pdf [file KID.0003962020SupplementaryData.pdf]

# Supplementary Appendix

## Table of Contents

Supplemental Table 1: UW subset characteristics.....2

Supplemental Table 2: Diagnoses among participants with primary NDKD.....3

Supplemental Table 3: Histopathologic features by race/ethnicity.....4

**Supplemental Table 1: UW subset characteristics from chart review (N = 79)**

| Variable                                                      | DN |     |         | NDKD |     |         |
|---------------------------------------------------------------|----|-----|---------|------|-----|---------|
|                                                               | No | Yes | Unknown | No   | Yes | Unknown |
| <b>Chart Data</b>                                             |    |     |         |      |     |         |
| Retinopathy                                                   | 4  | 25  | 6       | 26   | 6   | 12      |
| AKI                                                           | 29 | 6   |         | 17   | 27  |         |
| Rapid decline of eGFR                                         | 23 | 12  |         | 43   | 1   |         |
| Type I DM                                                     | 32 | 3   |         | 40   | 4   |         |
| Type II DM                                                    | 6  | 29  |         | 9    | 35  |         |
| Duration of DM < 10 years                                     | 17 | 12  | 6       | 13   | 15  | 16      |
| eGFR < 30                                                     | 7  | 15  | 13      | 5    | 15  | 24      |
| eGFR (continuous), per 15 mL/min/1.73m <sup>2</sup> increment |    |     |         |      |     |         |
| Urine protein < 3.5 g/g                                       | 18 | 3   | 14      | 13   | 4   | 27      |
| Urine protein (continuous), per 1 g/g increment               |    |     |         |      |     |         |
| RAAS inhibition                                               | 8  | 27  |         | 17   | 27  |         |
| Abnormal serology                                             | 27 | 8   |         | 26   | 18  |         |
| Hematuria (any)                                               | 12 | 10  | 13      | 12   | 21  | 11      |
| HbA1c < 8.0%                                                  | 12 | 16  | 7       | 11   | 20  | 13      |
| HbA1c (continuous), per 1.0% increment                        |    |     |         |      |     |         |

**Supplemental Table 2:** Diagnoses among participants with primary NDKD and primary NDKD with DN. Thirteen biopsies had a primary diagnosis FSGS and nephrosclerosis and are included in both categories. \*denotes diagnosis likely to alter clinical management.

|                                                    | Primary NDKD only (N = 140) | Primary NDKD with DN (N = 67) | Total (N = 207) |
|----------------------------------------------------|-----------------------------|-------------------------------|-----------------|
| FSGS                                               | 22                          | 17                            | 39              |
| Nephrosclerosis or focal global glomerulosclerosis | 21                          | 8                             | 29              |
| IgA nephropathy                                    | 16                          | 11                            | 27              |
| ATI                                                | 13                          | 8                             | 21              |
| Amyloidosis                                        | 12                          | 1                             | 13*             |
| Crescentic and necrotizing glomerulonephritis      | 10                          | 3                             | 13*             |
| Acute interstitial nephritis                       | 4                           | 8                             | 12*             |
| Membranous nephropathy                             | 8                           | 4                             | 12*             |
| Membranoproliferative glomerulonephritis           | 8                           | 3                             | 11*             |
| Infection-related GN                               | 2                           | 5                             | 7               |
| Lupus nephritis                                    | 6                           | 0                             | 6*              |
| MCD                                                | 4                           | 0                             | 4*              |
| Thrombotic microangiopathy                         | 4                           | 0                             | 4               |
| Thin basement membrane disease                     | 3                           | 0                             | 3               |
| Oxalosis                                           | 2                           | 0                             | 2               |
| Collapsing FSGS                                    | 3                           | 0                             | 3*              |
| Fibrillary GN                                      | 1                           | 2                             | 3*              |
| Chronic active TIN                                 | 2                           | 0                             | 2               |
| Immune complex glomerulopathy, NOS                 | 1                           | 1                             | 2               |
| Myeloma cast nephropathy                           | 1                           | 1                             | 2*              |
| Monoclonal immunoglobulin deposition disease       | 1                           | 0                             | 1*              |
| C3 glomerulonephritis                              | 0                           | 1                             | 1*              |
| Obesity- related glomerulopathy                    | 1                           | 0                             | 1               |
| IgG4 interstitial nephritis                        | 1                           | 0                             | 1               |

**Supplemental Table 3: Histopathologic Features by Race/ Ethnicity**

Primary NDKD (N= 72)

|                                          | FSGS    | Nephrosclerosis | IgA    | ATI    |
|------------------------------------------|---------|-----------------|--------|--------|
| Caucasian (N = 42)                       | 13 (31) | 37 (88)         | 3 (7)  | 8 (19) |
| Asian (N = 8)                            | 1 (12)  | 7 (88)          | 1 (12) | 3 (38) |
| Black (N = 11)                           | 2 (18)  | 9 (82)          | 1 (9)  | 3 (27) |
| Native American/Pacific Islander (N = 5) | 1 (20)  | 4 (80)          | 2 (40) | 1 (20) |
| Hispanic (N = 6)                         | 0 (0)   | 5 (83)          | 1 (17) | 1 (17) |

Primary DN (N = 58):

|                                          | FSGS    | Nephrosclerosis | IgA    | ATI    |
|------------------------------------------|---------|-----------------|--------|--------|
| Caucasian (N = 29)                       | 23 (79) | 29 (100)        | 3 (10) | 5 (17) |
| Asian (N = 15)                           | 11 (73) | 15 (100)        | 4 (27) | 4 (27) |
| Black (N = 7)                            | 5 (71)  | 6 (86)          | 0 (0)  | 0 (0)  |
| Native American/Pacific Islander (N = 3) | 3 (100) | 3 (100)         | 0 (0)  | 1 (33) |
| Hispanic (N = 4)                         | 2 (50)  | 4 (100)         | 0 (0)  | 0 (0)  |
